# Supplementary material for: Rapid on-site detection of imazaquin residue in corn and soybeans using an immunochromatographic assay
Source: Royal Society of Chemistry journal article supplement (doi:10.1039/d4tb02347a), 2025-01-01
Supplement: d4tb02347a1.pdf [file d4tb02347a1.pdf]

*Supporting information*

**Rapid on-site detection of imazaquin residue in corn and  
soybeans using an immunochromatographic assay**

## **Contents**

**Fig. S1.** Optimization of concentration of mAb and coating antigen (N, 0 mg/kg; P, 20  $\mu\text{g}/\text{kg}$  of IMQ).

**Fig. S2.** The LC-MS/MS spectrums for the identification of samples. (a) Corn sample. (b) Soybeans sample. (c) The IMQ standard solution.

**Fig. S3.** The LC-MS/MS spectrums for spiking different concentration of IMQ samples. (a) 5  $\mu\text{g}/\text{kg}$  in corn. (b) 10  $\mu\text{g}/\text{kg}$  in corn. (c) 50  $\mu\text{g}/\text{kg}$  in corn. (d) 5  $\mu\text{g}/\text{kg}$  in soybeans. (e) 10  $\mu\text{g}/\text{kg}$  in soybeans. (f) 50  $\mu\text{g}/\text{kg}$  in soybeans.

**Table S1.** Instrument conditions for the analysis of IMQ by LC-MS/MS.

**Table S2.** The comparisons of mAb performance.

**Table S3.** The comparisons of detection methods.

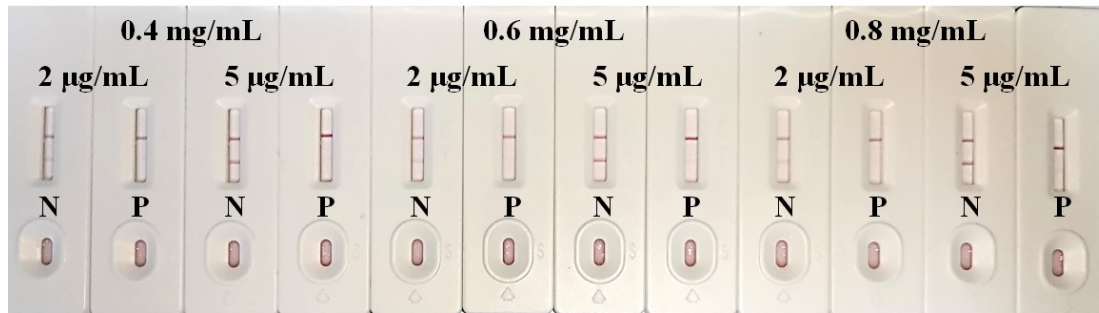

**Fig. S1.** Optimization of concentration of mAb and coating antigen (N, 0 mg/kg; P, 20 µg/kg of IMQ).

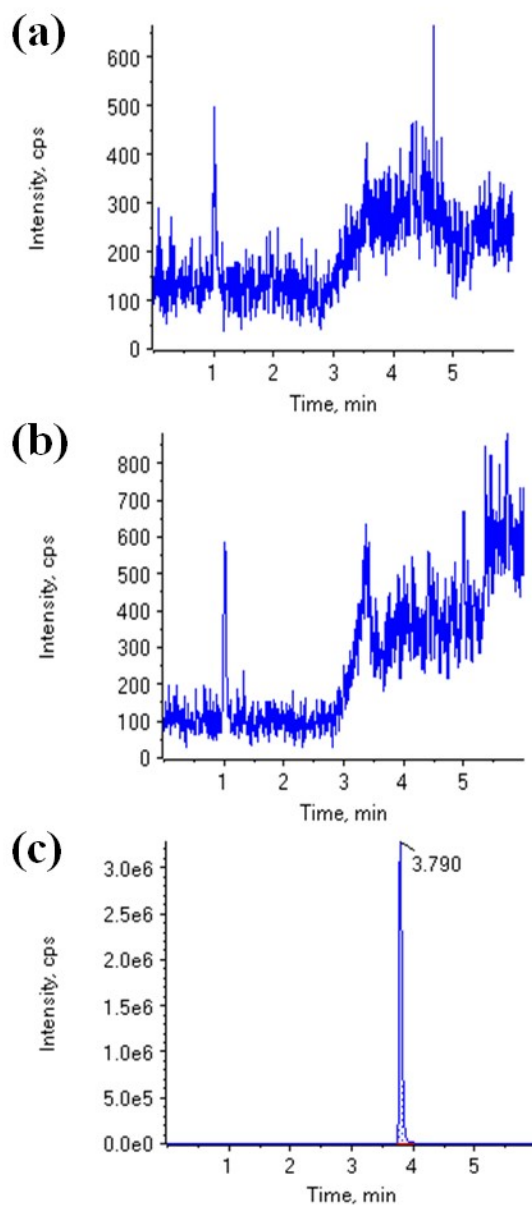

**Fig. S2.** The LC-MS/MS spectrums for the identification of samples. (a) Corn sample. (b) Soybeans sample. (c) The IMQ standard solution.

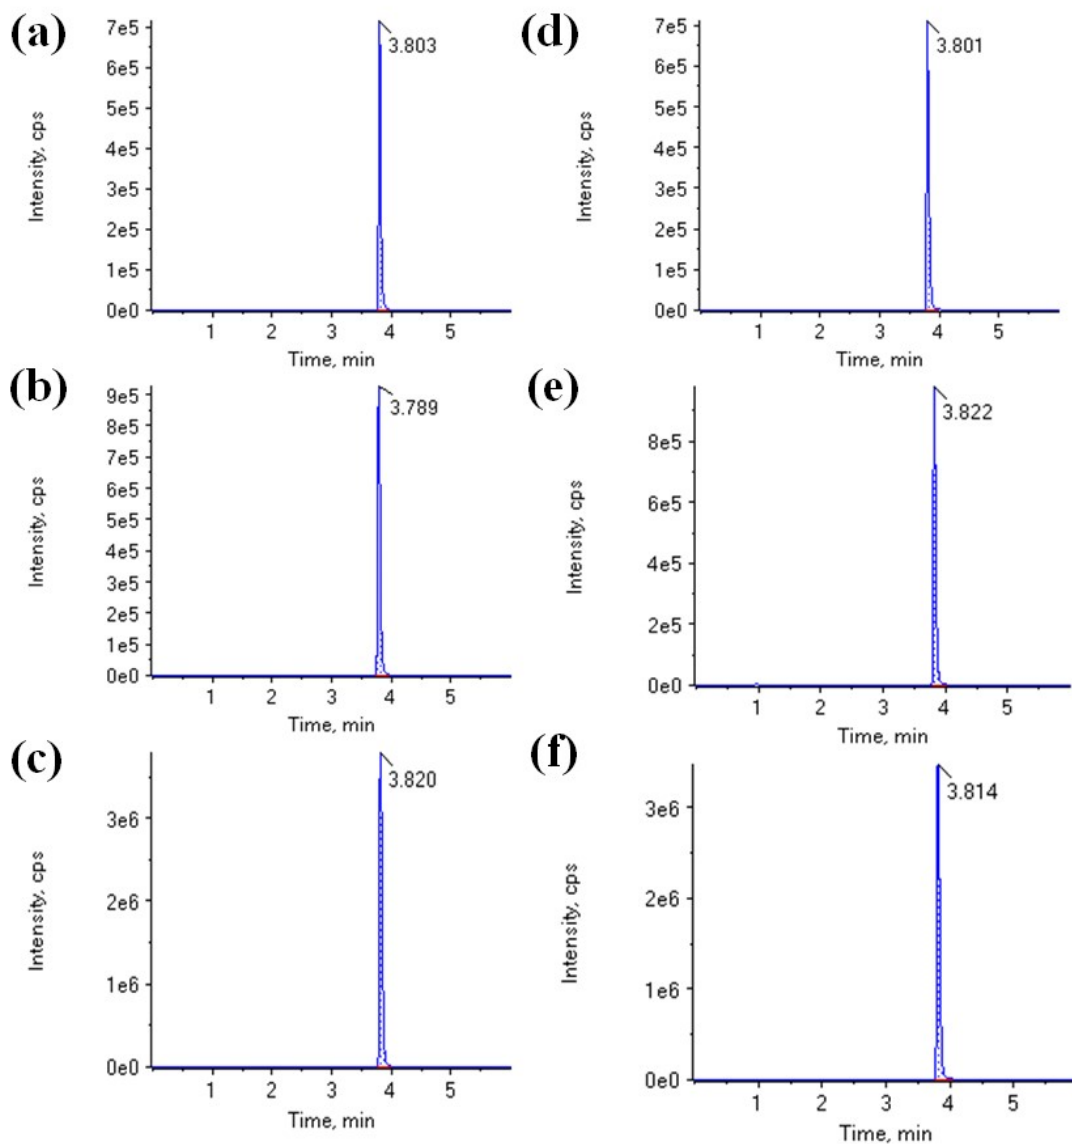

**Fig. S3.** The LC-MS/MS spectrums for spiking different concentration of IMQ samples. (a) 5  $\mu\text{g}/\text{kg}$  in corn. (b) 10  $\mu\text{g}/\text{kg}$  in corn. (c) 50  $\mu\text{g}/\text{kg}$  in corn. (d) 5  $\mu\text{g}/\text{kg}$  in soybeans. (e) 10  $\mu\text{g}/\text{kg}$  in soybeans. (f) 50  $\mu\text{g}/\text{kg}$  in soybeans.

**Table S1.** Instrument conditions for the analysis of IMQ by LC-MS/MS.

|                          |                                                  |     |     |
|--------------------------|--------------------------------------------------|-----|-----|
| Instrument               | AB SCIEX QTRAP 5500                              |     |     |
| Chromatographic column   | BEH C18 column (2.5 $\mu$ m , 2.1 $\times$ 50mm) |     |     |
| Column temperature       | 40°C                                             |     |     |
| Injection volume         | 2 $\mu$ l                                        |     |     |
| Velocity of flow         | 0.30mL/min                                       |     |     |
| Mobile phase             | A: 0.1% formic acid in water<br>B: acetonitrile  |     |     |
| Gradient elution program | Time (min)                                       | A   | B   |
|                          | 0                                                | 95% | 5%  |
|                          | 1                                                | 95% | 5%  |
|                          | 4                                                | 5%  | 95% |
|                          | 6                                                | 5%  | 95% |
|                          | 6.1                                              | 98% | 2%  |
|                          | 9                                                | 98% | 2%  |
| Mass spectrometry mode   | Positive ion mode                                |     |     |

**Table S2.** The comparisons of mAb performance.

| Analog      | IC <sub>50</sub> (ng/mL)    |                                          |                                          |
|-------------|-----------------------------|------------------------------------------|------------------------------------------|
|             | mAb from IMQ<br>(this work) | mAb from hapten 2<br>(Chin et al., 2002) | mAb from hapten 3<br>(Chin et al., 2002) |
| Imazaquin   | 0.98                        | 5                                        | -                                        |
| Imazapyr    | 12.4                        | 290                                      | -                                        |
| Imazethapyr | 14.5                        | 34                                       | -                                        |
| Imazapic    | 16.2                        | 31                                       | -                                        |
| Imazamox    | >20                         | 34                                       | -                                        |

**Table S3.** The comparisons of detection methods.

| Detection methods | Detection time  | Limit of detection (LOD) ( $\mu\text{g}/\text{kg}$ ) | Simultaneously test the quantity of samples | References           |
|-------------------|-----------------|------------------------------------------------------|---------------------------------------------|----------------------|
| ICA strips        | 15 min          | 0.26                                                 | Abundant                                    | This work            |
| UHPLC-MS/MS       | At least 30 min | 0.5                                                  | Several                                     | (Heo et al., 2022)   |
| GC-MS             | At least 45 min | 0.02                                                 | Several                                     | (Ozcan et al., 2017) |



## References

- Chin, T. E., Wong, R. B., Pont, J. L., & Karu, A. E. (2002). Haptens and Monoclonal Antibodies for Immunoassay of Imidazolinone Herbicides. *J Agric Food Chem*, *50*, 3380-3389.
- Heo, H. M., Jo, H. W., Chang, H. R., & Moon, J. K. (2022). Development of Simultaneous Analytical Method for Imidazolinone Herbicides from Livestock Products by UHPLC-MSMS. *Foods*, *11*(12), 1781.
- Ozcan, C., Cebi, U. K., Gurbuz, M. A., & Ozer, S. (2017). Residue Analysis and Determination of IMI Herbicides in Sunflower and Soil by GC-MS. *Chromatographia*, *80*(6), 941-950.
